# Supplementary material for: Crystal structure of Synechococcus elongatus 6-4 photolyase suggests a novel repairing mechanism
Source: Research Square preprint supplement (doi:10.21203/rs.3.rs-3074148/v1), 2023-07-11
Supplement: Supplementary file 1 [file 1630356f3202c4da42f566f9.docx]

**Contents**

Supplementary Methods

Table S1

Figure S1

Figure S2

Figure S3

Figure S4

Supplementary References

**METHODS**

**Plasmids, mutagenesis, expression and purification**

The pETSePhrB and pETAfPhrB plasmids contain the inserted *SephrB* and *AfphrB* genes in the pET22b vector, respectively1. The YVGH2RRPY mutant [substitution of theD loop coding sequence of *Se*PhrB (coding Arg42-Tyr45) for that of *Af*PhrB (coding Tyr40-His43)] and RRPY2YVGH mutant[substitution of the D loop coding sequence of *Af*PhrB (coding Tyr40-His43) for that of *Se*PhrB (coding Arg42-Tyr45)] were generated by site-directed PCR mutagenesis using the pETAfPhrB and pETSePhrB plasmids as template, respectively. The plasmids containing the wild-type or mutant genes were either transformed alone, or co-transformed with the pCDFScFbiC plasmid that contains the *S. coelicolor* *fbiC* gene (*ScfbiC*) in the pCDFDuet-1 vector1, into competent BL21(DE3) cells, to express the proteins without or with 8-HDF reconstitution *in vivo*. The culture and induction conditions were as those described previously1. The proteins were purified by using a Ni2+ chelating Sepharose column and then by gel filtration. Protein buffer contained 50 mM Tris-HCl, pH 7.2, 200 mM NaCl, and 10% glycerol.

**Crystallization and structure analyses**

The purified *Se*PhrB protein was concentrated to 10 mg ml-1 for crystallization. Initial protein crystals were obtained at 20°C in condition of 20% (w/v) PEG 8000, 100 mM Tris-HCl, pH 8.5, 200 mM MgCl2. The protein to reservoir ratios is 1:1 in three-well sitting-drop crystallization plates. The crystals were cryoprotected by reservoir solutions supplemented with 30% glycerol, and flash-cooled in liquid nitrogen. Data was collected at BL19U1 Beamline of the Shanghai Synchrotron Radiation Facility under 100 K liquid nitrogen stream. The data were processed with HKL30002, and the initial phase was determined by molecular replacement with CCP43 program Phaser4, using the crystal structure of *Af*PhrB (PDB ID: 4DJA)5 as the model. Further refinement was performed with CCP4 program Refmac56 and WinCoot7. Data collection and refinement statistics are reported in Table S1. The modelled 6-4PP-*Se*PhrB complex structure was made by docking the 6-4PP containing DNA in *Drosophila melanogaster* 6-4 photolyase-DNA complex (PDB ID: 3CVV)8 to *Se*PhrB using HDOCK server (http://hdock.phys.hust.edu.cn)9. The 2D interaction diagrams of *Af*PhrB-DMRL and *Se*PhrB-8-HDF were generated by LigPlot+ (https://www.ebi.ac.uk/thornton-srv/software/LigPlus/)10. Structural figures were created using PyMOL (Schrödinger).

**Absorption spectroscopy**

Absorption spectra of samples were recorded on a UV-1800 spectrophotometer equipped with a TCC-240A temperature controller (Shimadzu). Semi-micro quartz cuvettes (200 µl) were used. The scanning range was from 200 nm to 750 nm.

**Thin-layer chromatography**

The authentic samples and the supernatant samples of denatured proteins were spotted onto Type G silica gel plates (Sangon), and chromatograms were developed with the mixture of *n*-butanol/acetic acid/water, 5:2:3. The fluorescent spots were observed in a UV analyzer and photos were taken from the observation window.

**Determination of the 6-4 photolyase activity**

The activity of the protein samples was measured in a 200-µl system with 0.1 µM of protein, 15 µM UV irradiated oligo-thymidylate (UV-dT16), 4 mM MgCl2 and 1 mM DTT in the protein buffer. The samples were illuminated at various wavelengths using LED lamps. The *k*cat value was estimated by *k*325/*ε*325/[E0], where *k*325 was the slope of absorbance decrease at 325 nm, *ε*325 was the molar extinction coefficient at 325 nm of the 6-4 photoproducts that is ~6,000 M-1 cm-1, and [E0] was the enzyme concentration. The photolytic cross section (*εφ*) was calculated by the Equation11:

*εφ* = 5.2 × 108 *k*cat/λ*L*

where *ε* (in M-1 cm-1) is the molar extinction coefficient of enzyme at the illumination wavelength *λ* (in nm); *φ* is the quantum yield of photorepair; *L* is the illumination dose in J m-2. The action spectra were obtained by plotting the *εφ* values *vs*. the illumination wavelengths.

**Denaturation and ultrafiltration experiments**

The *Se*PhrB samples (without or with 8-HDF) were either kept in dark or illuminated under blue light (*λ*max = 440 nm, irradiance of ∼190 W m–2) for 20 min. Then the protein samples were denatured under anaerobic conditions by adding SDS to a final concentration of 1%, and ultrafiltrated using 30 kDa cutoff Amicon Ultra-15 centrifugal filter devices (Merck Millipore). The retentates and the filtrates were withdrawn, and the absorption spectra of which were determined. For oxidation experiments, the retentates were kept under aerobic conditions at 30°C, and the absorption spectra were recorded at intervals.

**Mass** **spectrometry**

Mass spectra were determined on a XevoG2-XS QTof mass spectrometer equipped with an H-Class ACQUITY UPLC using a BEH300 C4 column (Waters). A 1-μl aliquot of sample solution was injected into the column, and eluted with 0.1% formic acid in an acetonitrile/water (1:9) mixture at a flow rate of 0.3 ml min-1 with the column temperature at 80°C. The mass spectrometric detection mode was positive-ion, and the scan range was 500-4000 m/z. The molecular mass values of the proteins were calculated by deconvolution of the raw data.

**Table S1**

|  | *Se*PhrB (PDB ID: 8IJY) |
| --- | --- |
| **Data collection** |  |
| Space group | C2221 |
| Cell dimensions |  |
| *a, b, c* (Å) | 105.0, 109.1, 95.2 |
| *α, β, γ* (°) | 90, 90, 90 |
| Resolution (Å) | 47.35-2.29 (2.37-2.29)a |
| *R*merge | 0.157 (0.543) |
| *I*/*σ* (*I*) | 13.5 (3.2) |
| CC1/2  Wilson B-factor (Å2) | 1.003 (0.919)  30.9 |
| Completeness (%) | 99.9 (100) |
| Redundancy | 8.8 (7.3) |
| **Refinement** |  |
| Resolution (Å) | 47.35-2.29 (2.37-2.29) |
| No. reflections | 22890 |
| *R*work / *R*free | 0.18/0.24 |
| No. atoms | 4336 |
| Protein residues | 501 |
| Ligands  waters | 6  101 |
| r.m.s. deviations |  |
| Bond lengths (Å) | 0.017 |
| Bond angles (°) | 1.66 |
| Ramachandran favored (%) | 97.19 |
| Ramachandran allowed (%) | 2.81 |

a Values in parentheses are for highest-resolution shell

**Supplementary Figures**


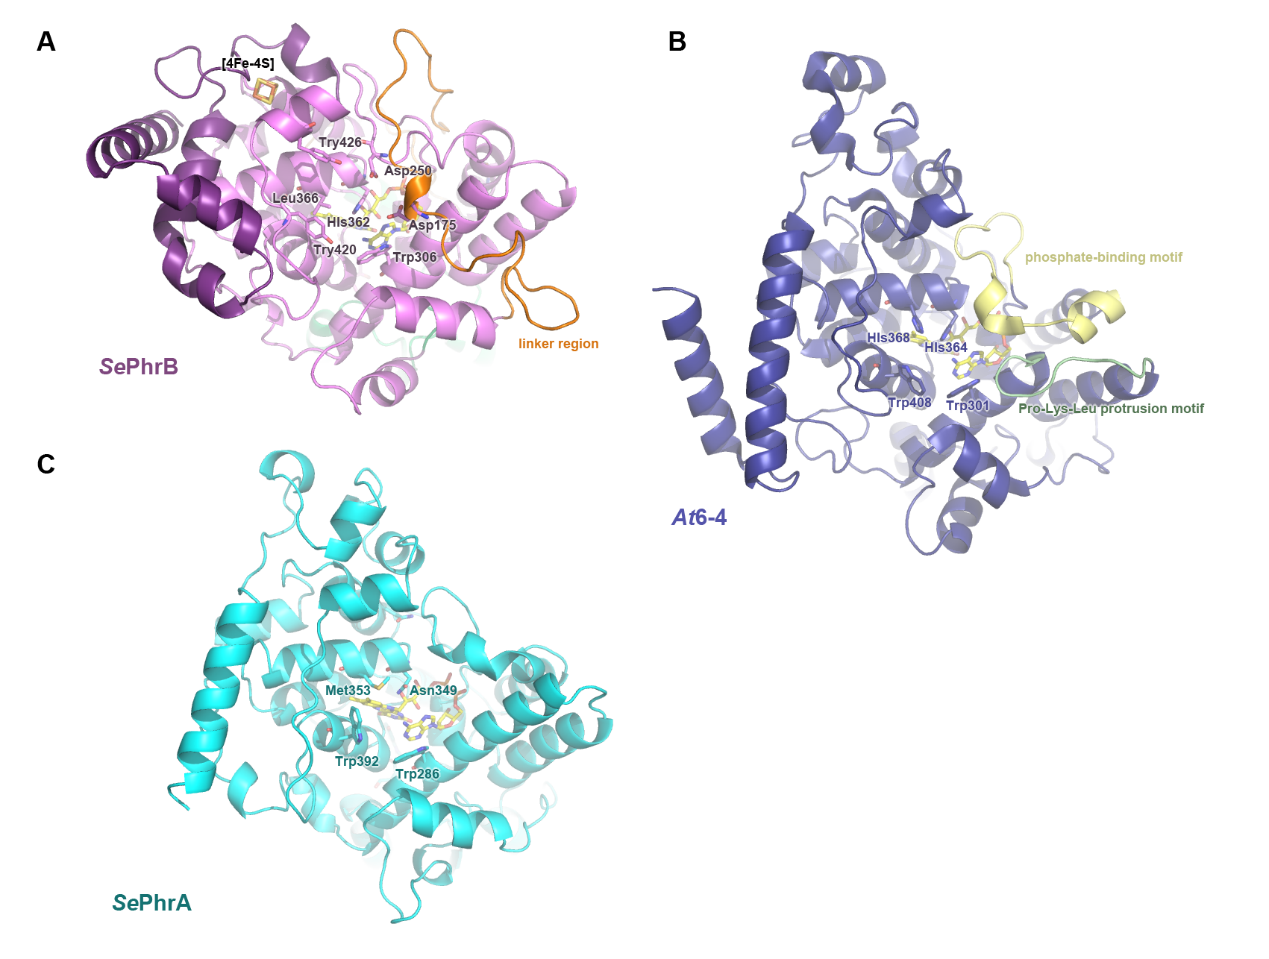


**Fig. S1** Comparison of the structures around the active centers of various photolyases. (A) *Se*PhrB (PDB ID: 8IJY). The linker region is shown in orange. (B) *At*6-4 (PDB ID: 3FY4)12. The phosphate-binding motif is shown in pale yellow, and the Pro-Lys-Leu protrusion motif is shown in pale green. (C) *Se*PhrA (PDB ID: 1TEZ)13. The key residues, FAD, and the [4Fe-4S] cluster are shown in stick representations.


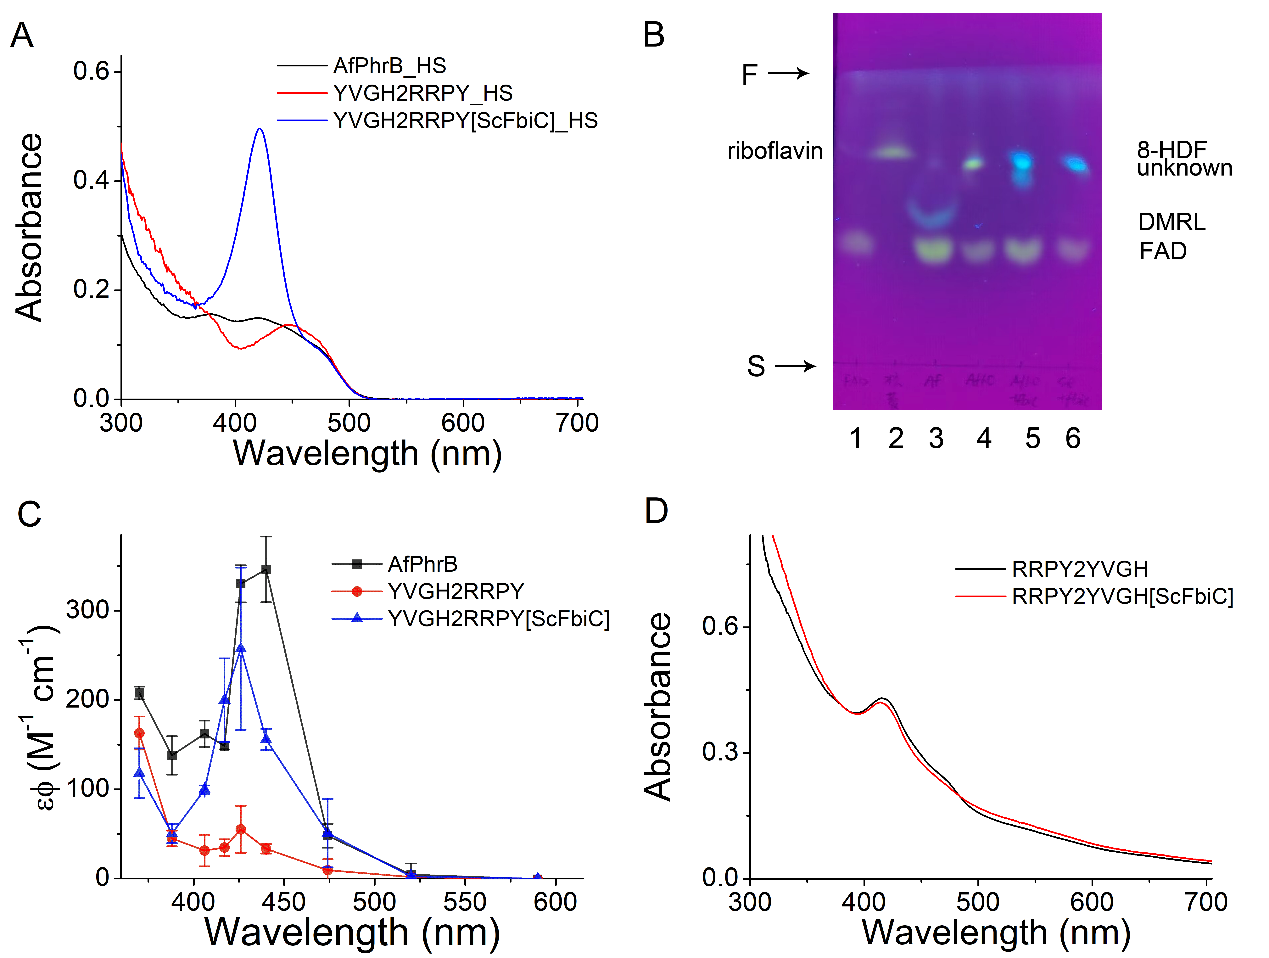


**Fig. S2** The effects of the D loop sequence on the antenna cofactor specificity and activity of *Af*PhrB and *Se*PhrB. (A) Absorption spectra of the supernatants of heat denatured samples of wild-type *Af*PhrB (black line), the YVGH2RRPY mutant of *Af*PhrB (red line), and the YVGH2RRPY mutant of *Af*PhrB co-expressed with the 8-HDF synthase of *S. coelicolor* (*Sc*FbiC) (blue line). (B) The thin-layer chromatography of authentic FAD (lane 1), authentic riboflavin (lane 2), the supernatants of heat denatured samples of wild-type *Af*PhrB (lane 3), the YVGH2RRPY mutant of *Af*PhrB (lane 4), the YVGH2RRPY mutant of *Af*PhrB co-expressed with *Sc*FbiC (lane 5), and *Se*PhrB co-expressed with *Sc*FbiC (lane 6). The solvent system was *n*-butanol/acetic acid/water, 5:2:3. The start and front positions (S and F) are indicated by arrows. There was a small yellow band of the YVGH2RRPY mutant sample that migrated similar as 8-HDF, but slightly slower than riboflavin. The chemical nature of this band is to be determined. (C) The action spectra of wild-type *Af*PhrB (black boxes and line), the YVGH2RRPY mutant of *Af*PhrB (red circles and line), and the YVGH2RRPY mutant of *Af*PhrB co-expressed with the 8-HDF synthase of *S. coelicolor* (*Sc*FbiC) (blue triangles and line) for photorepair 6–4 photoproducts *in vitro*. *εϕ* means the photolytic cross section. Data points represent means ± SD (*n* = 3). The repair activity of the YVGH2RRPY mutant with 8-HDF is not largely increased compared with that without 8-HDF. (D) Absorption spectra show that substitution of the D loop sequence of *Af*PhrB (YVGH) for that of *Se*PhrB (RRPY) abolished the 8-HDF binding but did not convert the antenna cofactor specificity to DMRL.


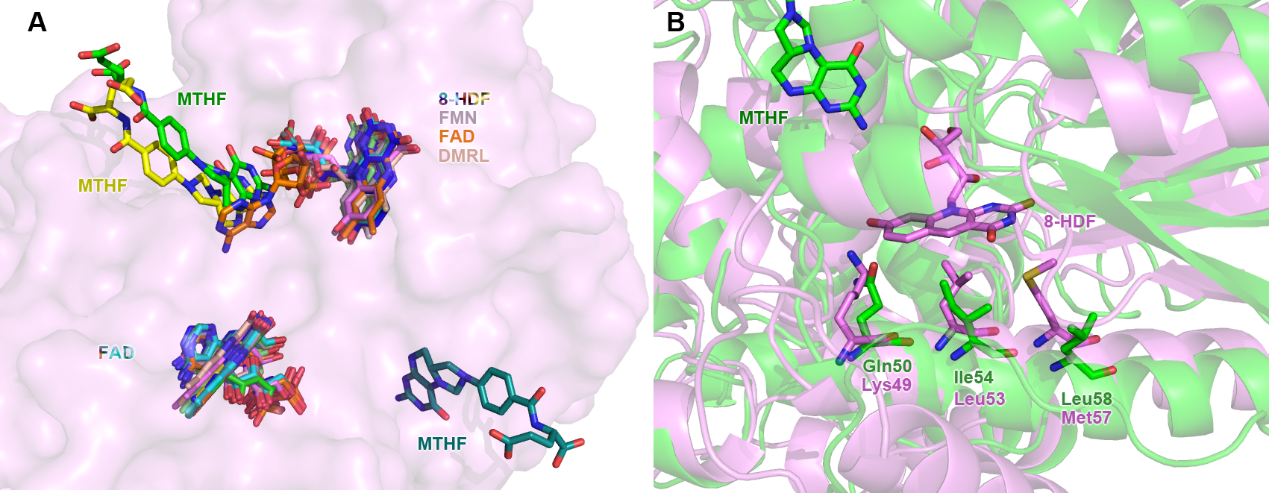


**Fig. S3** The FAD and antenna cofactor binding modes of various photolyases. (A) The crystal structures of photolyases are overlayed, and the FAD and antenna cofactors are shown in stick representations. The antenna cofactor type: 1) MTHF, *Escherichia coli* Class I CPD photolyase *Ec*CPDI (PDB ID: 1DNP, green stick)14, *A. fabrum* Class III CPD photolyase *Af*PhrA (PDB ID: 4U63, deep teal stick)15, and *A. thaliana* DASH *At*Cry3 (PDB ID: 2VTB, yellow stick)16; 2) 8-HDF, *S. elongatus* Class I CPD photolyase *Se*PhrA (PDB ID: 1TEZ, cyan stick)13, *S. elongatus* prokaryotic 6-4 photolyase *Se*PhrB (PDB ID: 8IJY, violet stick), *Methanosarcina mazei* Class II CPD photolyase (PDB ID: 4CDN, pale green stick)17, and *D. melanogaster* eukaryotic 6-4 photolyase (PDB ID: 3CVV, blue stick)8; 3) FMN, *Thermus thermophilus* Class I CPD photolyase (PDB ID: 2J09, grey stick)18; 4) FAD, *Sulfolobus tokodaii* Class I CPD photolyase (PDB ID: 2E0I, orange stick)19; 5) DMRL, *A. fabrum* prokaryotic 6-4 photolyase *Af*PhrB (PDB ID: 4DJA, wheat stick)5. (B) Homologous residues identified in MTHF binding photolyase *Ec*CPDI (PDB ID: 1DNP, green cartoon and stick) and 8-HDF binding photolyase *Se*PhrB (PDB ID: 8IJY, violet cartoon and stick).


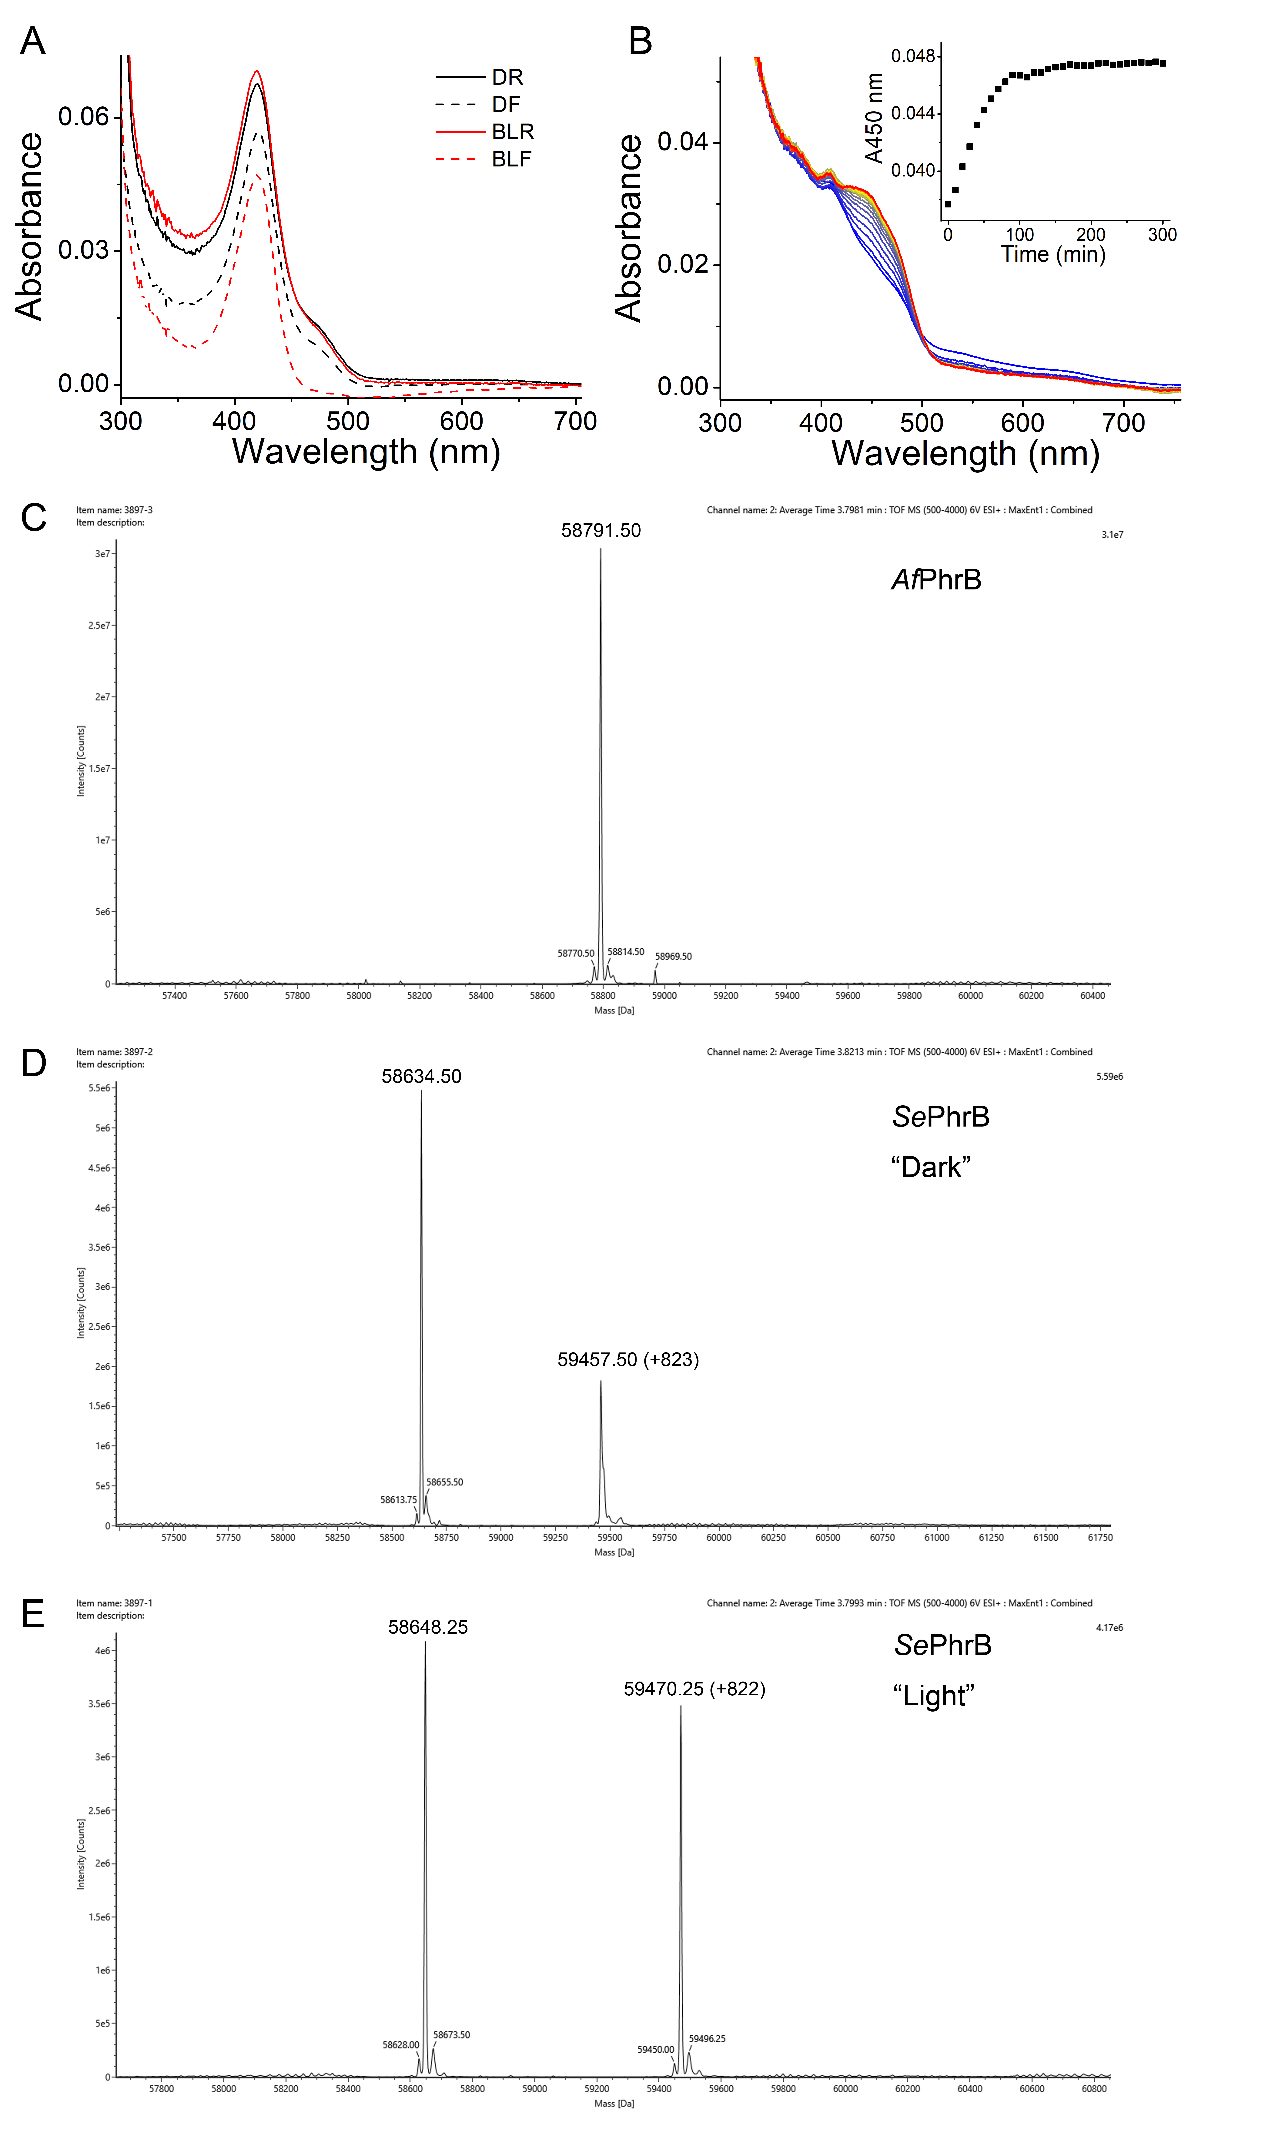


**Fig. S4** The light-dependent linkage between FAD and a nearby methionine residue in *Se*PhrB. (A) Ultrafiltration and analysis by absorption spectroscopy of dark-state and blue-light illuminated *Se*PhrB-8HDF samples denatured by 1% SDS. DR and DF, the retentate and filtrate of the dark-state sample. BLR and BLF, the retentate and filtrate of the blue-light illuminated sample. There is a peak at ~450 nm in DF, which is absent in BLF, indicating that the FAD cofactor linked to the protein after illumination. (B) The FAD-methionine adduct was stable when *Se*PhrB denatured by 1% SDS. The half-life of the FAD-methionine adduct is ~40 min under aerobic conditions, while free reduce flavin has a half-life of only ~25 ms20. When oxidized, the adduct was decomposed and FAD was released. (C), (D), and (E) Deconvoluted ESI mass spectra of *Af*PhrB, dark-purified *Se*PhrB (“dark”), and blue-light illuminated *Se*PhrB (“light”).

**REFERENCES**

1 Chen, S. *et al.* Identification and characterization of a prokaryotic 6-4 photolyase from Synechococcus elongatus with a deazariboflavin antenna chromophore. *Nucleic Acids Res.* **50**, 5757-5771 (2022).

2 Minor, W., Cymborowski, M., Otwinowski, Z. & Chruszcz, M. HKL-3000: the integration of data reduction and structure solution--from diffraction images to an initial model in minutes. *Acta Crystallogr D Biol Crystallogr* **62**, 859-866 (2006).

3 Winn, M. D. *et al.* Overview of the CCP4 suite and current developments. *Acta Crystallogr D Biol Crystallogr* **67**, 235-242 (2011).

4 McCoy, A. J. *et al.* Phaser crystallographic software. *J. Appl. Crystallogr.* **40**, 658-674 (2007).

5 Zhang, F., Scheerer, P., Oberpichler, I., Lamparter, T. & Krauss, N. Crystal structure of a prokaryotic (6-4) photolyase with an Fe-S cluster and a 6,7-dimethyl-8-ribityllumazine antenna chromophore. *Proc Natl Acad Sci U S A* **110**, 7217-7222 (2013).

6 Murshudov, G. N. *et al.* REFMAC5 for the refinement of macromolecular crystal structures. *Acta Crystallogr D Biol Crystallogr* **67**, 355-367 (2011).

7 Emsley, P., Lohkamp, B., Scott, W. G. & Cowtan, K. Features and development of Coot. *Acta Crystallogr D Biol Crystallogr* **66**, 486-501 (2010).

8 Glas, A. F. *et al.* The archaeal cofactor F0 is a light-harvesting antenna chromophore in eukaryotes. *Proc Natl Acad Sci U S A* **106**, 11540-11545 (2009).

9 Yan, Y., Tao, H., He, J. & Huang, S. Y. The HDOCK server for integrated protein-protein docking. *Nat Protoc* **15**, 1829-1852 (2020).

10 Laskowski, R. A. & Swindells, M. B. LigPlot+: multiple ligand-protein interaction diagrams for drug discovery. *J Chem Inf Model* **51**, 2778-2786 (2011).

11 Rupert, C. S. Photoenzymatic repair of ultraviolet damage in DNA. II. Formation of an enzyme-substrate complex. *J. Gen. Physiol.* **45**, 725-741 (1962).

12 Hitomi, K. *et al.* Functional motifs in the (6-4) photolyase crystal structure make a comparative framework for DNA repair photolyases and clock cryptochromes. *Proc Natl Acad Sci U S A* **106**, 6962-6967 (2009).

13 Mees, A. *et al.* Crystal structure of a photolyase bound to a CPD-like DNA lesion after in situ repair. *Science* **306**, 1789-1793 (2004).

14 Park, H. W., Kim, S. T., Sancar, A. & Deisenhofer, J. Crystal structure of DNA photolyase from Escherichia coli. *Science* **268**, 1866-1872 (1995).

15 Scheerer, P. *et al.* The class III cyclobutane pyrimidine dimer photolyase structure reveals a new antenna chromophore binding site and alternative photoreduction pathways. *J. Biol. Chem.* **290**, 11504-11514 (2015).

16 Pokorny, R. *et al.* Recognition and repair of UV lesions in loop structures of duplex DNA by DASH-type cryptochrome. *Proc Natl Acad Sci U S A* **105**, 21023-21027 (2008).

17 Kiontke, S. *et al.* Crystal structures of an archaeal class II DNA photolyase and its complex with UV-damaged duplex DNA. *EMBO J.* **30**, 4437-4449 (2011).

18 Klar, T. *et al.* Natural and non-natural antenna chromophores in the DNA photolyase from Thermus thermophilus. *ChemBioChem* **7**, 1798-1806 (2006).

19 Fujihashi, M. *et al.* Crystal structure of archaeal photolyase from Sulfolobus tokodaii with two FAD molecules: implication of a novel light-harvesting cofactor. *J. Mol. Biol.* **365**, 903-910 (2007).

20 Tu, S. C. Reduced flavin: donor and acceptor enzymes and mechanisms of channeling. *Antioxid. Redox Signal.* **3**, 881-897 (2001).
